# Supplementary material for: Solid-state 87Rb NMR signatures for rubidium cations bound to a G-quadruplex
Source: Royal Society of Chemistry journal article supplement (doi:10.1039/b505674h), 2005-01-01

© The Royal Society of Chemistry 2005

Solid-state  $^{87}\text{Rb}$  NMR signatures for rubidium cations bound to a G-quadruplex

By

Ramsey Ida and Gang Wu\*

Department of Chemistry, Queen's University  
Kingston, Ontario, Canada K7L 3N6  
Fax: 613 533 2644  
E-mail: [gangwu@chem.queensu.ca](mailto:gangwu@chem.queensu.ca)

- (1) X-ray powder diffraction data
- (2)  $^{13}\text{C}$  CP/MAS NMR spectra
- (3)  $^{23}\text{Na}$  MAS NMR spectra for G1 and G2 samples

# X-ray powder diffraction data

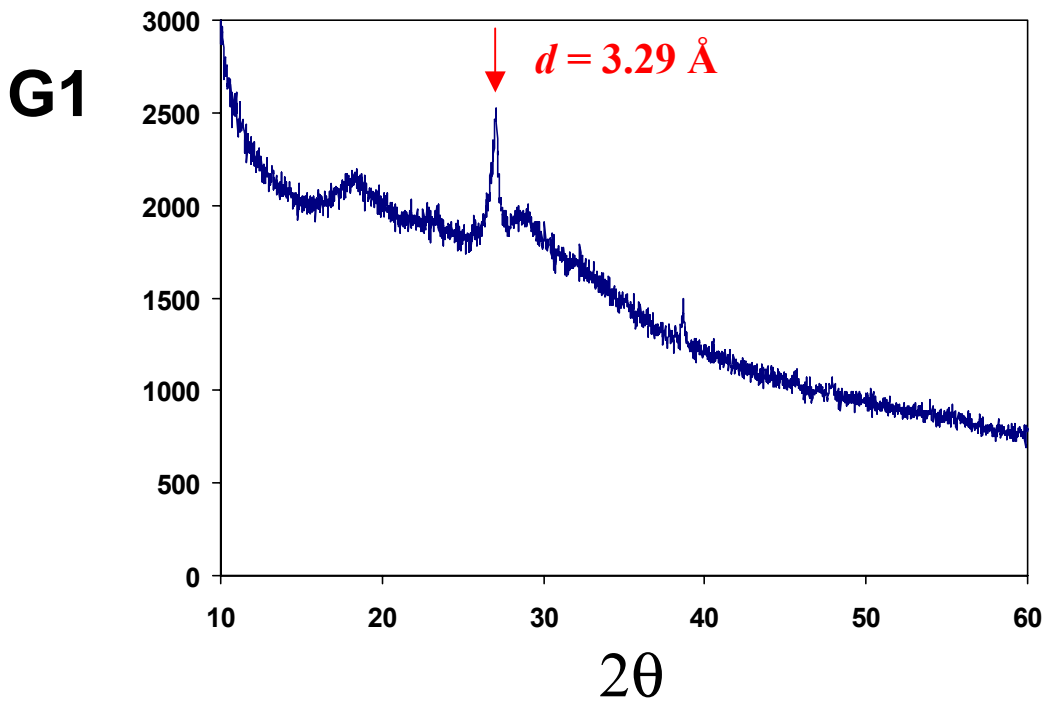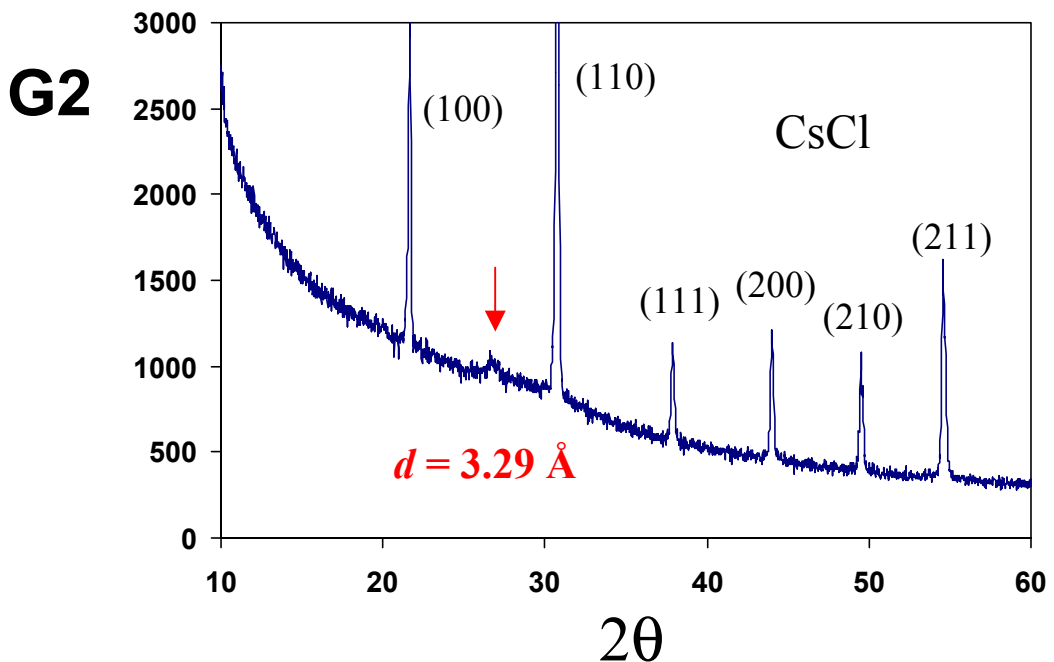

# $^{13}\text{C}$ CP/MAS NMR spectra (w TPPM) at 11.75 T

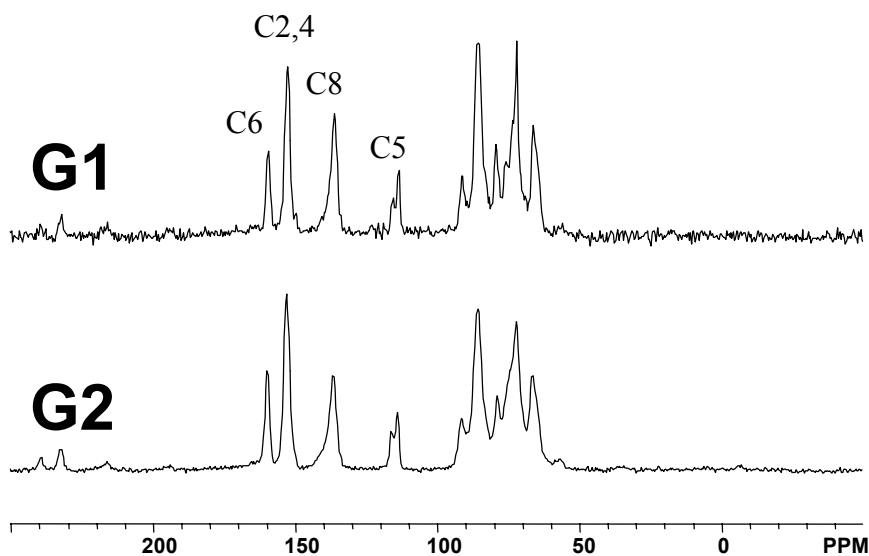

# $^{23}\text{Na}$ MAS NMR spectra at 11.75 T

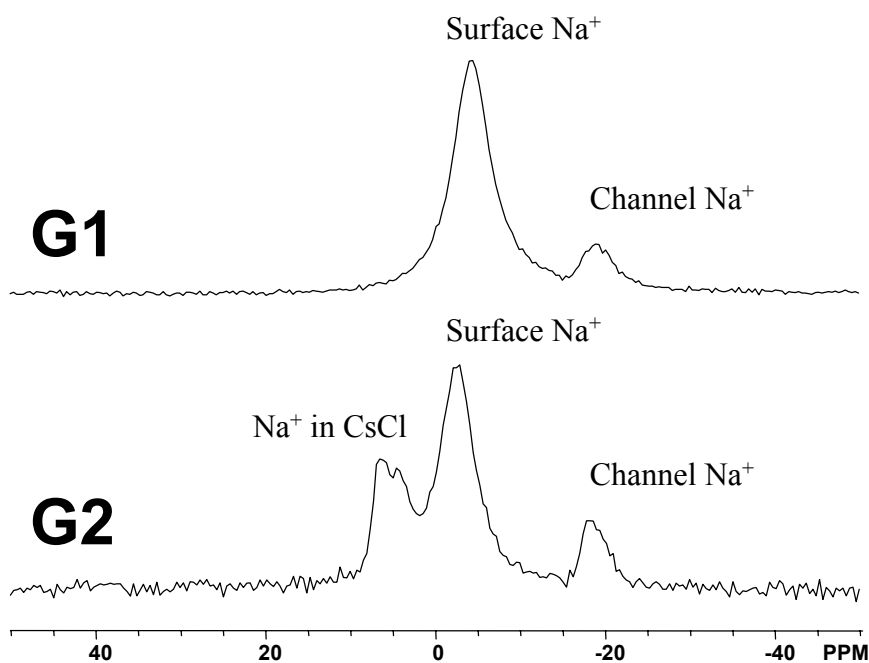

Supplement: b505674h.pdf [file b505674h.pdf]
